# Supplementary material
Source: publisher figshare collection journal article supplement (https://acs.figshare.com/ndownloader/files/25801694)
Supplement: Supplementary file 1 [file 25801694]

1  
2  
3  
4  
5  
6  
7  
8  
9  
10  
11  
12  
13  
14  
15

# Supporting Information for

## Ballast water exchange plus treatment lowers species invasion rate in freshwater ecosystems

*Johanna N. Bradie<sup>1,2</sup>, D. Andrew R. Drake<sup>1</sup>, Dawson Ogilvie<sup>1</sup>, Oscar Casas-Monroy<sup>1</sup>, and Sarah  
A. Bailey<sup>1\*</sup>*

<sup>1</sup>Great Lakes Laboratory for Fisheries and Aquatic Sciences, Fisheries and Oceans Canada, 867  
Lakeshore Road, Burlington, ON, L7S 1A1, Canada

<sup>2</sup>Current address: Great Lakes Institute for Environmental Research, University of Windsor, 401  
Sunset Ave, Windsor, ON, N9B 3P4

Number of pages: 12  
Number of tables: 4  
Number of figures: 7

16 **Table S1.** Sample size of voyages ( $n = 2,980$ ) for each salinity combination within a given  
 17 shipping pathway. Sample year indicates the timespan for which transit data were available for  
 18 each region.

| Recipient Port Salinity | Source Port Salinity | All Shipping Pathways | Great Lakes-St. Lawrence River International | Pacific International | Atlantic International | Arctic International | Arctic Domestic |
|-------------------------|----------------------|-----------------------|----------------------------------------------|-----------------------|------------------------|----------------------|-----------------|
|                         | Fresh                | 87                    | 67                                           | 9                     | 11                     | 0                    | 0               |
| Fresh                   | Brackish             | 77                    | 58                                           | 17                    | 2                      | 0                    | 0               |
|                         | Marine               | 324                   | 186                                          | 136                   | 2                      | 0                    | 0               |
|                         | Fresh                | 27                    | 0                                            | 0                     | 27                     | 0                    | 0               |
| Brackish                | Brackish             | 40                    | 0                                            | 1                     | 39                     | 0                    | 0               |
|                         | Marine               | 59                    | 0                                            | 26                    | 33                     | 0                    | 0               |
|                         | Fresh                | 458                   | 0                                            | 105                   | 329                    | 4                    | 20              |
| Marine                  | Brackish             | 638                   | 0                                            | 153                   | 478                    | 7                    | 0               |
|                         | Marine               | 1,270                 | 0                                            | 940                   | 307                    | 18                   | 5               |
|                         | Sample Year          |                       | 2006                                         | 2008                  | 2006                   | 2015                 | 2015            |

19

20

21 **Table S2.** Number of empirical ballast water samples available with estimates of zooplankton  
22 abundance and species richness for each shipping pathway. Note that due to limited biological  
23 data, the Arctic domestic pathway used zooplankton data from ships arriving to the Arctic from  
24 Atlantic Canada, and from internal Great Lakes-St. Lawrence River transits.

| <b>Shipping Pathway</b>                      | <b>Number of Samples</b> |
|----------------------------------------------|--------------------------|
| Pacific International                        | 50                       |
| Atlantic International                       | 39                       |
| Great Lakes-St. Lawrence River International | 19                       |
| Arctic International                         | 31                       |
| Arctic Domestic                              | 74                       |

25

26

27 **Table S3.** Model parameters used to estimate the mean number of nonindigenous zooplankton  
 28 species establishing in Canadian ecosystems.

| Model Parameter                                       |             | Shipping Pathway                             |                       |                        |                      |                  |           |
|-------------------------------------------------------|-------------|----------------------------------------------|-----------------------|------------------------|----------------------|------------------|-----------|
|                                                       |             | Great Lakes-St. Lawrence River International | Pacific International | Atlantic International | Arctic International | Arctic Domestic* |           |
|                                                       |             |                                              |                       |                        |                      | Atlantic         | GLSLR     |
| Sample Concentration (Negative Binomial Distribution) | <i>size</i> | 0.6297                                       | 0.2783                | 0.8268                 | 0.2894               | 1.5618           | 0.4034    |
|                                                       | $\mu$       | 752.00                                       | 8861.66               | 13099.23               | 1661.77              | 77349.90         | 123550.70 |
| Population Concentration Error                        |             |                                              |                       | Poisson                |                      |                  |           |
| Proportion Nonindigenous (Beta)                       | $\alpha$    | 0.7515                                       | 0.2302                | 0.1842                 | 0.0973               | 1.0696           | 0.2411    |
|                                                       | $\beta$     | 0.4004                                       | 2.9896                | 14.1509                | 0.4625               | 7.9209           | 1.1468    |
| <b>All Trips</b>                                      |             |                                              |                       |                        |                      |                  |           |
| Probability Single Propagule Establishes (Beta)       | $\alpha$    |                                              |                       | 0.005                  |                      |                  |           |
|                                                       | $\beta$     |                                              |                       | 5                      |                      |                  |           |
| Allee Effect                                          | $c$         |                                              |                       | 1                      |                      |                  |           |

\*The Arctic domestic pathway used zooplankton data from ships arriving to the Arctic from Atlantic Canada, and from internal Great Lakes-St. Lawrence River transits.

30 **Table S4.** Sensitivity analysis results.

| Management Scenario | Null | Randomized Port Pairings | Transit Frequency |      | Mean Plankton Concentration $\mu$ |             | Mean Nonindigenous $\beta$ |             | $\alpha = 0.005$ | All Species | Allee Effect $c = 2$ |
|---------------------|------|--------------------------|-------------------|------|-----------------------------------|-------------|----------------------------|-------------|------------------|-------------|----------------------|
|                     |      |                          | +25%              | -25% | +25%                              | -25%        | +25%                       | -25%        |                  |             |                      |
| NM                  | 1.85 | 1.86                     | 2.00              | 1.76 | 2.13                              | 1.73        | 2.03                       | 1.76        | <b>54.63</b>     | <b>3.98</b> |                      |
| E                   | 1.87 | 1.89                     | 1.99              | 1.74 | 2.13                              | 1.72        | 2.02                       | 1.70        | <b>54.32</b>     | <b>3.92</b> |                      |
| T (PE)              | 0.80 | 0.81                     | 0.89              | 0.73 | 0.86                              | 0.78        | 0.87                       | 0.74        | <b>22.29</b>     | <b>1.78</b> |                      |
| E+T (PE)            | 0.75 | 0.77                     | 0.81              | 0.71 | 0.82                              | 0.79        | 0.83                       | 0.68        | <b>20.83</b>     | <b>1.69</b> |                      |
| T (FE)              | 0.06 | 0.06                     | 0.07              | 0.06 | 0.07                              | 0.07        | <b>0.08</b>                | 0.05        | <b>0.48</b>      | 0.05        |                      |
| E+T (FE)            | 0.05 | 0.06                     | 0.06              | 0.06 | 0.06                              | <b>0.07</b> | <b>0.07</b>                | <b>0.03</b> | <b>0.35</b>      | <b>0.03</b> |                      |

The response variable is the mean number of species per year among all Canadian ports (fresh, brackish, and marine) examined in this study. The management methods assessed are no management (NM), exchange only (E), treatment only (T), and exchange plus treatment (E+T). Ballast water treatment systems were either partially effective on half of the transits (PE) or fully effective on all transits (FE). An outcome with less or greater than 1:1 response indicates the model is insensitive or very sensitive to changes to a parameter. Outcomes with large deviations (>25% change) relative to the null are in bold.

32 **Figure S1.** The Canadian geographical regions with the shipping ports examined in this study.  
 33 The four Canadian regions of interest are the Pacific, Atlantic, Great Lakes-St. Lawrence River  
 34 (GLSLR), and Arctic. The Great Lakes-St. Lawrence River region includes all freshwater ports  
 35 upstream of and including Québec City. The destination ports ( $n = 72$ ) included in this study are  
 36 displayed by the markers where their color and size represent their salinity category and number  
 37 of arrivals, respectively.

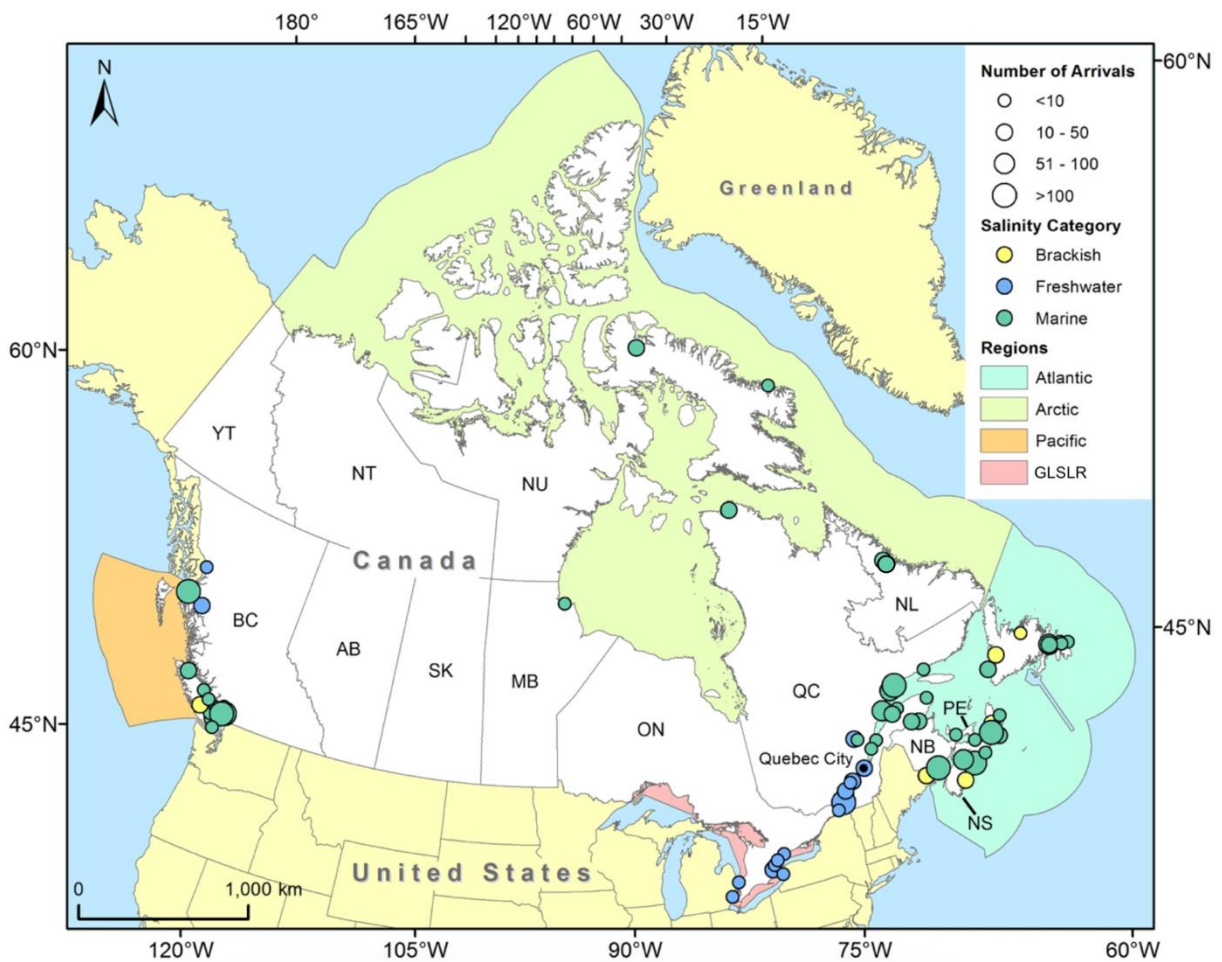

38

39

40 **Figure S2.** Probability distribution describing the zooplankton sample concentration (individuals  
41 per m<sup>3</sup>) among ship transits within each shipping pathway. The Arctic domestic pathway used  
42 zooplankton data from ships arriving to the Arctic from Atlantic Canada (bottom right panel),  
43 and from internal Great Lakes-St. Lawrence River (GLSLR) transits (bottom left panel). The  
44 black lines represent the probability density function.

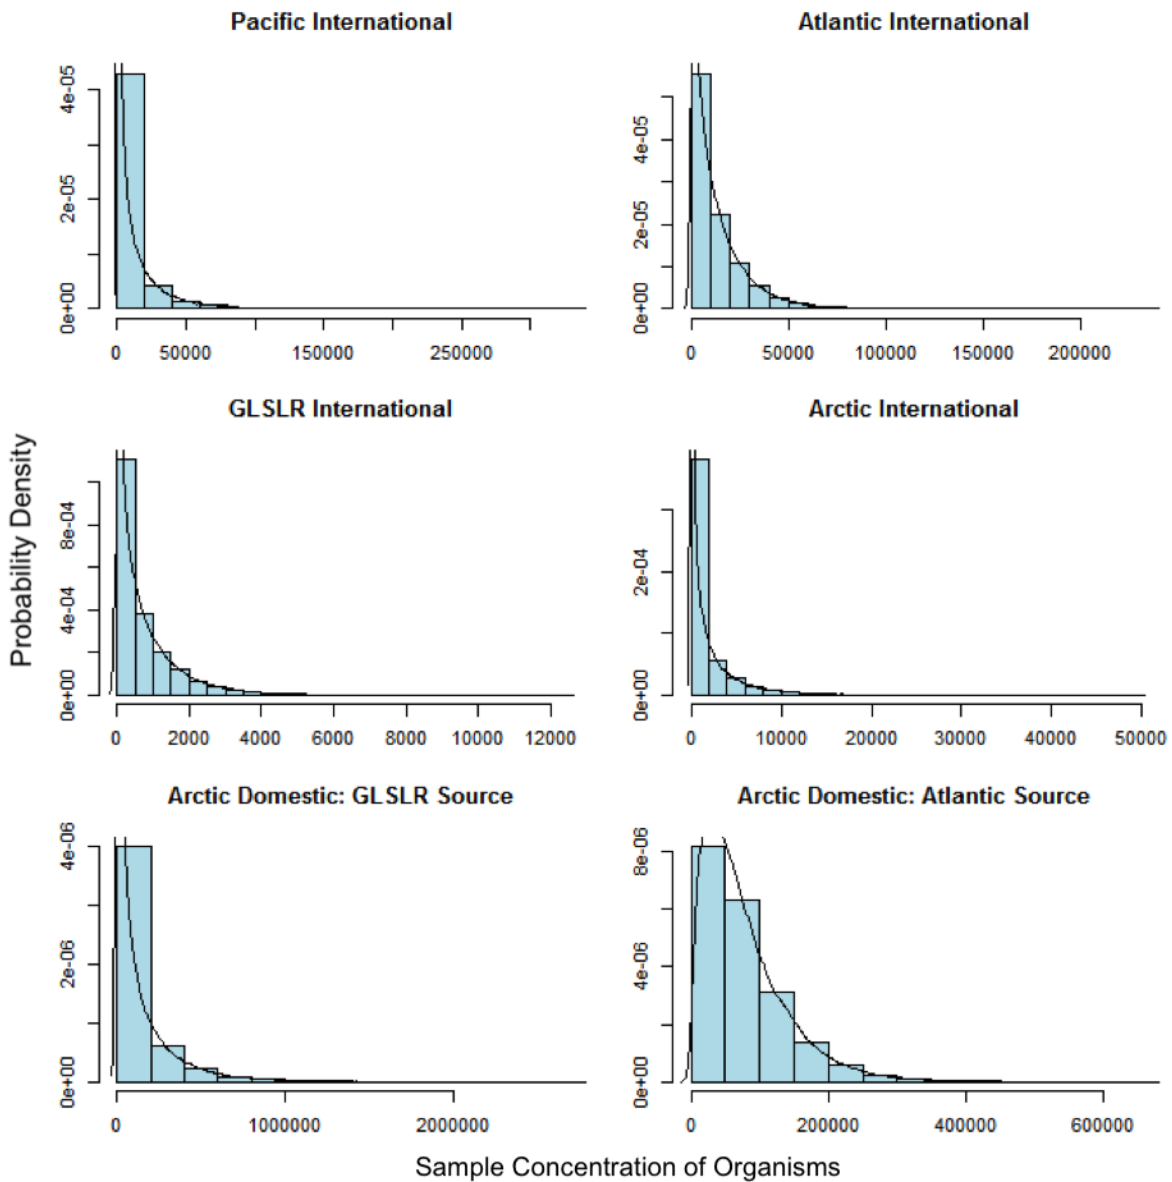

45

46 **Figure S3.** An example  $C_p | C_s$  distribution describing the population concentration of  
47 zooplankton in a single ship, with a sample concentration of 10,000 zooplankton per  $m^3$ .

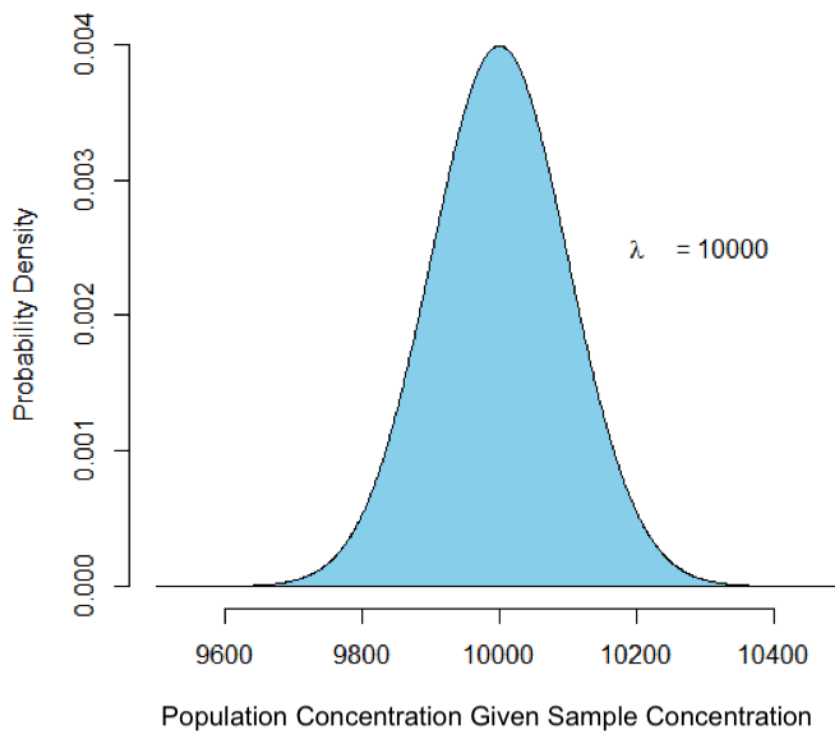

48

49



50 **Figure S4.** Probability distributions describing the proportion of nonindigenous zooplankton out  
51 of the total organism concentration among ship trips within each shipping pathway. The Arctic  
52 domestic pathway used zooplankton data from ships arriving to the Arctic from Atlantic Canada  
53 (bottom right panel), and from internal Great Lakes-St. Lawrence River (GLSLR) transits  
54 (bottom left panel). The black lines represent the probability density function.

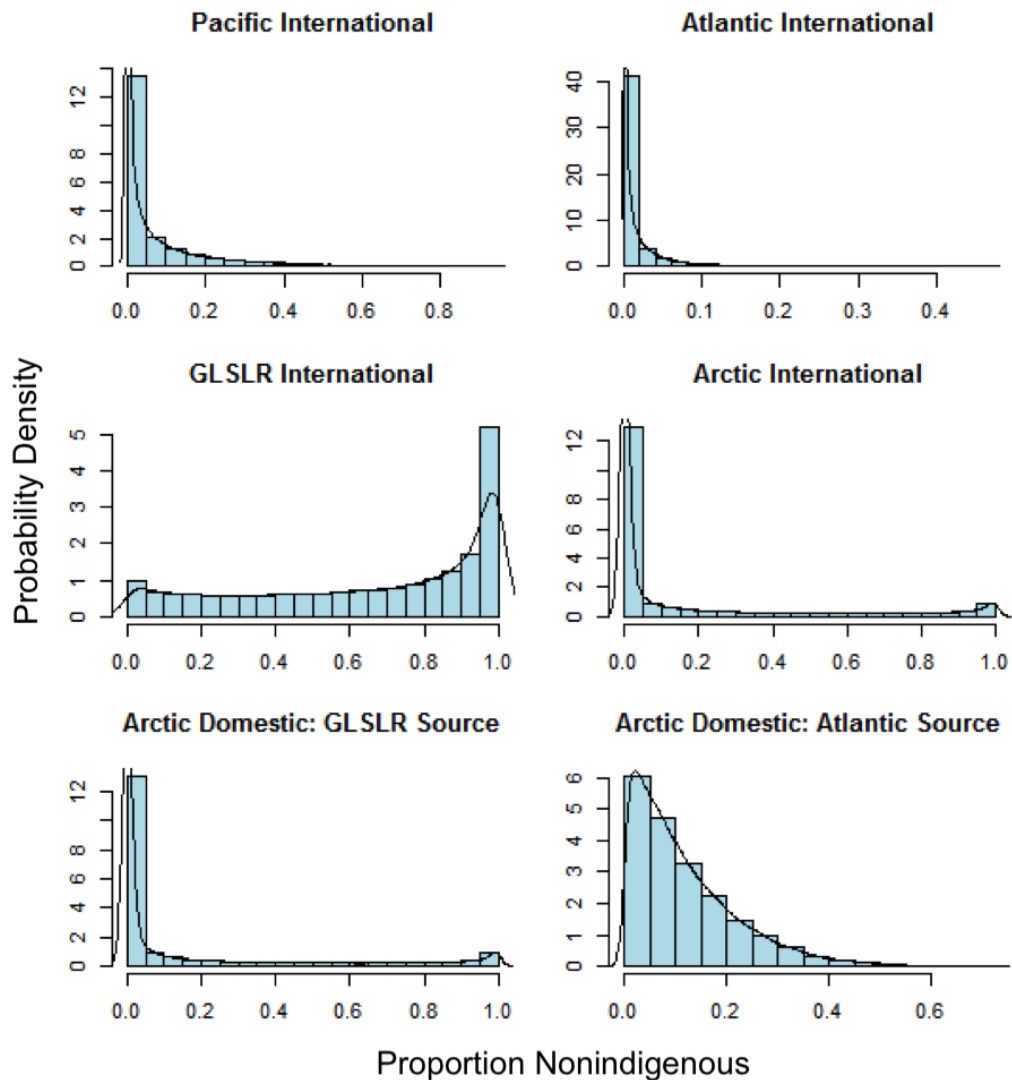

55

56 **Figure S5.** Environmental distance curve.  $P(Y=1)$  represents the probability of survival in the  
57 recipient environment given the temperature match between the source and recipient  
58 environments.

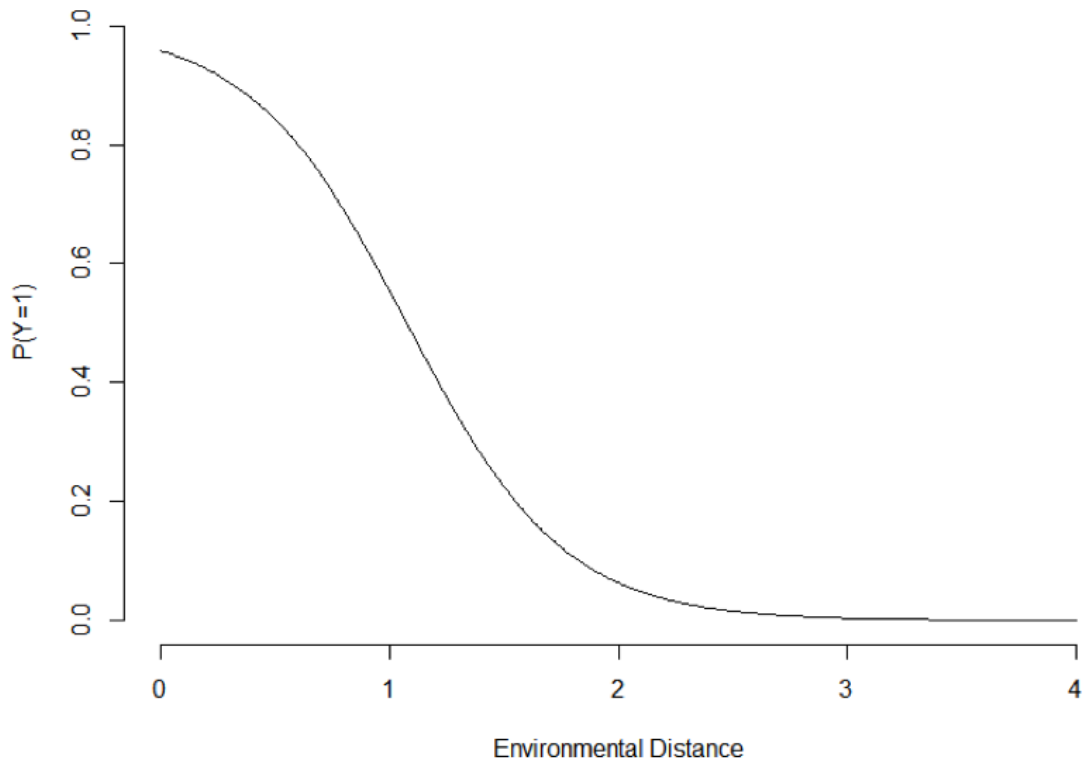

59

60

61 **Figure S6.** Examples of the probability of establishment based on the per-capita probability of  
62 establishment ( $\alpha$ ), initial organism concentration (individuals per  $m^3$ ), and Allee effect ( $c$ ).

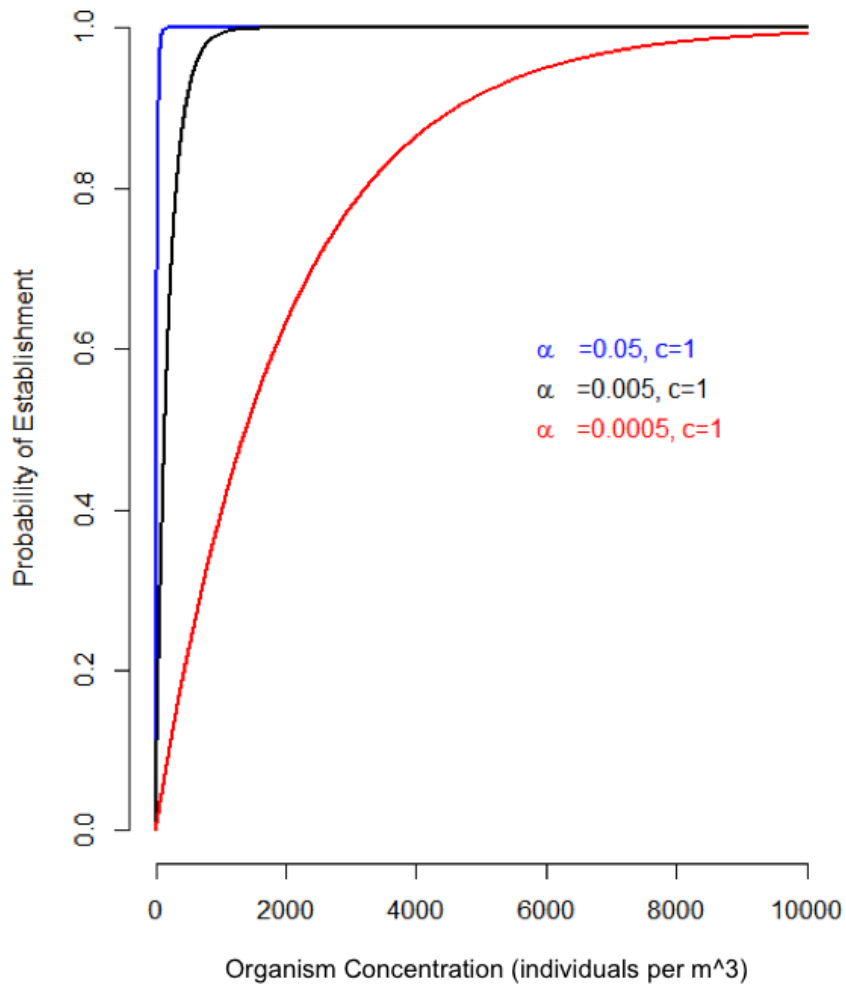

63

64

65 **Figure S7.** Probability distribution describing the per-capita probability of establishment ( $\alpha$ )  
66 across multiple species in a ballast tank. This distribution was identical across all trips and  
67 shipping pathways.

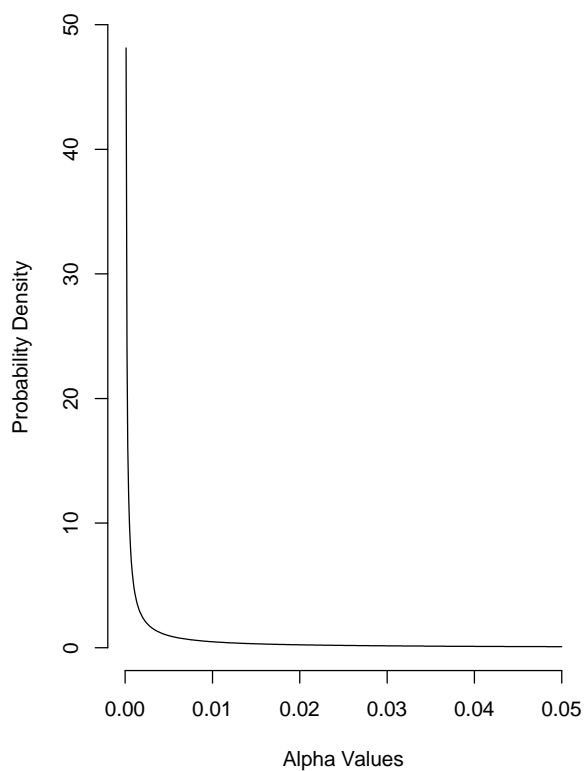

68

69
